# Supplementary material
Source: ML conference proceedings conference paper supplement (https://aclanthology.org/P14-1054)
Supplement: Software [file Readme.pdf › Software/Readme.pdf]

2014.1.10

- [1]. **Folder Consensus** contains the VC++2008 project for Chinese Relation Extraction. It is the main program.
- [2]. **Folder RFM** reserves implementation of random field model (or Maximum Entropy) provided by *Le Zhang*<sup>1</sup>. The original program is tailored for our utilization. In our toolkit, it is given as VC++2008 project. (In the new edition, this model is merged into the main program directly)
- [3]. **Folder Fortran** stores the FORTRAN limited-memory quasi-Newton (L-BFGS) implementation. We already compiled it into static lib. To restart the compile need the *Microsoft VC++2008* and *Intel Parallel Studio XE 2011* environment.
- [4]. **Folder Corpus** should hold the ACE 2005 RDC for Chinese corpus. Due to reasons of copyright, we do not put the data in.
- [5]. **Folder Data** will hold the intermediate results for this program. Three files also included in this folder as follows:
  - “CVMC.dat” is the *Lexicon Common Words in Contemporary Chinese*.

In order to run this program, the **ICTCLAS package**<sup>2</sup>, **Xerces-C++**<sup>3</sup> and **boost\_1\_38\_0**<sup>4</sup> are required. Details of this can be seen in corresponding manual. The **Consensus** project setting must include such toolkits. These setting can be obtained from our source file in **Consensus** project.

If the program is running, the UI should be as follows. Details about our work can be seen from our paper. For more information, please contact us by e-mail: \*\*\*\* (not available yet, because of author anonymity)

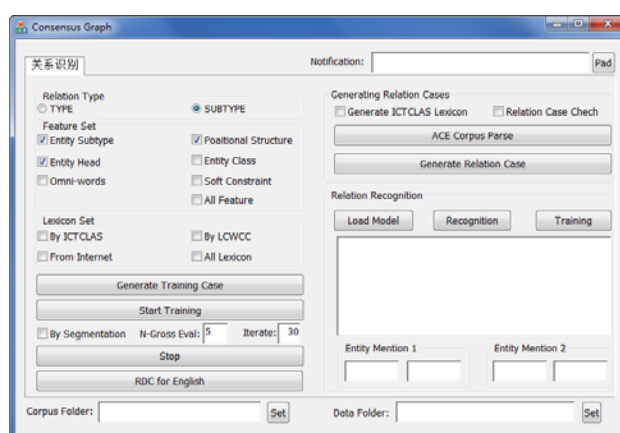

<sup>1</sup> [http://homepages.inf.ed.ac.uk/lzhang10/maxent\\_toolkit.html](http://homepages.inf.ed.ac.uk/lzhang10/maxent_toolkit.html)

<sup>2</sup> <http://ictclas.org/>

<sup>3</sup> <http://xerces.apache.org/xerces-c/index.html>

<sup>4</sup> [http://sourceforge.net/projects/boost/files/boost/1.38.0/boost\\_1\\_38\\_0.zip/download](http://sourceforge.net/projects/boost/files/boost/1.38.0/boost_1_38_0.zip/download)
